# Supplementary material for: Identification of Regulatory Molecular “Hot Spots” for LH/PLOD Collagen Glycosyltransferase Activity
Source: MDPI journal article supplement (doi:10.3390/ijms241311213), 2023-07-07
Supplement: s1 [file s1]

Supplementary Data for

**Identification of regulatory molecular hot spots for  
LH/PLOD collagen glycosyltransferase activity**

D. Mattoteia, A. Chiapparino, *et al.*

**Table S1: crystallographic statistics for data collection, structure solution and refinement.**<sup>a</sup> Values in parentheses are for reflections in the highest resolution shell.

|                                    | LH3/PL0D3<br>+ Fe <sup>2+</sup> + Mn <sup>2+</sup><br>+ UDP         | LH3/PL0D3<br>+ Fe <sup>2+</sup> + Mn <sup>2+</sup><br>+ UDP-GlcA    | LH3/PL0D3<br>+ Fe <sup>2+</sup> + Mn <sup>2+</sup><br>+ UDP-Xyl     | LH3/PL0D3<br>Val80Lys<br>+ Fe <sup>2+</sup> + Mn <sup>2+</sup>      | LH3/PL0D3<br>Val80Lys<br>+ Fe <sup>2+</sup> + Mn <sup>2+</sup><br>+ UDP-Glc | LH3/PL0D3<br>Val80Lys<br>+ Fe <sup>2+</sup> + Mn <sup>2+</sup><br>+ UDP-GlcA | LH3/PL0D3<br>Asp190Ser + Fe <sup>2+</sup><br>+ Mn <sup>2+</sup><br>+ UDP-Glc |
|------------------------------------|---------------------------------------------------------------------|---------------------------------------------------------------------|---------------------------------------------------------------------|---------------------------------------------------------------------|-----------------------------------------------------------------------------|------------------------------------------------------------------------------|------------------------------------------------------------------------------|
| <b>Data Collection<sup>a</sup></b> |                                                                     |                                                                     |                                                                     |                                                                     |                                                                             |                                                                              |                                                                              |
| X-ray source                       | ESRF ID30A-3                                                        | SLS X06SA                                                           | ESRF ID23-EH2                                                       | SLS X06SA                                                           | SLS X06SA                                                                   | SLS X06SA                                                                    | ESRF ID23-EH2                                                                |
| Processing programs                | XDS, AIMLESS, STARANISO                                                     | XDS, AIMLESS, STARANISO                                                      | XDS, AIMLESS, STARANISO                                                      |
| Space group                        | C222 <sub>1</sub>                                                           | C222 <sub>1</sub>                                                            | C222 <sub>1</sub>                                                            |
| Cell parameters                    | a = 97.0 Å; α = 90°<br>b = 100.0 Å; β = 90°<br>c = 225.2 Å; γ = 90° | a = 98.2 Å; α = 90°<br>b = 100.5 Å; β = 90°<br>c = 224.7 Å; γ = 90° | a = 97.2 Å; α = 90°<br>b = 100.0 Å; β = 90°<br>c = 224.0 Å; γ = 90° | a = 98.0 Å; α = 90°<br>b = 100.8 Å; β = 90°<br>c = 225.7 Å; γ = 90° | a = 98.1 Å; α = 90°<br>b = 100.4 Å; β = 90°<br>c = 225.2 Å; γ = 90°         | a = 98.0 Å; α = 90°<br>b = 99.8 Å; β = 90°<br>c = 224.5 Å; γ = 90°           | a = 97.1 Å; α = 90°<br>b = 100.2 Å; β = 90°<br>c = 223.8 Å; γ = 90°          |
| Wavelength (Å)                     | 0.968                                                               | 1.000                                                               | 0.873                                                               | 1.000                                                               | 1.000                                                                       | 1.000                                                                        | 0.775                                                                        |
| Resolution (Å)                     | 48.84-2.30<br>(2.38-2.30)                                           | 49.10-2.20<br>(2.26-2.20)                                           | 48.79-2.40<br>(2.49-2.40)                                           | 49.14-3.00<br>(3.18-3.00)                                           | 49.02-2.30<br>(2.38-2.30)                                                   | 49.00-2.70<br>(2.83-2.70)                                                    | 48.88-2.30<br>(2.38-2.30)                                                    |
| Total reflections                  | 230588 (21551)                                                      | 430059 (32322)                                                      | 237715 (25682)                                                      | 93694 (15275)                                                       | 251674 (15330)                                                              | 197473 (22212)                                                               | 322199 (25283)                                                               |
| Unique reflections                 | 48288 (4455)                                                        | 56604 (4537)                                                        | 43005 (4500)                                                        | 22529 (3578)                                                        | 49068 (4243)                                                                | 30477 (3911)                                                                 | 48804 (4443)                                                                 |
| CC1/2 <sup>b</sup>                 | 0.997 (0.512)                                                       | 0.999 (0.860)                                                       | 0.992 (0.586)                                                       | 0.986 (0.490)                                                       | 0.998 (0.461)                                                               | 0.996 (0.580)                                                                | 0.995 (0.587)                                                                |
| Redundancy                         | 4.8 (4.8)                                                           | 7.6 (7.1)                                                           | 5.5 (5.7)                                                           | 4.2 (4.3)                                                           | 5.1 (3.6)                                                                   | 6.5 (5.7)                                                                    | 6.6 (5.7)                                                                    |
| Mean I/σ(I)                        | 8.4 (0.9)                                                           | 11.8 (0.5)                                                          | 5.5 (0.7)                                                           | 4.5 (0.7)                                                           | 6.7 (0.8)                                                                   | 9.4 (1.3)                                                                    | 5.7 (0.5)                                                                    |
| Completeness (%)                   | 98.7 (99.7)                                                         | 99.8 (98.6)                                                         | 99.9 (99.9)                                                         | 99.0 (98.5)                                                         | 98.7 (94.0)                                                                 | 99.5 (98.3)                                                                  | 99.9 (99.9)                                                                  |
| R <sub>sym</sub> <sup>b</sup>      | 0.118 (1.476)                                                       | 0.104 (2.566)                                                       | 0.209 (1.831)                                                       | 0.227 (3.045)                                                       | 0.100 (1.351)                                                               | 0.138 (1.312)                                                                | 0.175 (1.827)                                                                |
| R <sub>pim</sub> <sup>c</sup>      | 0.086 (1.107)                                                       | 0.060 (1.554)                                                       | 0.147 (1.274)                                                       | 0.186 (2.479)                                                       | 0.071 (1.155)                                                               | 0.088 (0.902)                                                                | 0.107 (1.255)                                                                |

<sup>b</sup>  $R_{\text{sym}} = [ \sum_{\text{hkl}} \sum_j | I_{\text{hkl},j} - \langle I_{\text{hkl}} \rangle | ] / [ \sum_{\text{hkl}} \sum_j I_{\text{hkl},j} ]$ , where I is the observed intensity for a reflection and  $\langle I \rangle$  is the average intensity obtained from multiple observations of symmetry-related reflections.

<sup>c</sup>  $R_{\text{pim}} = [ \sum_{\text{hkl}} (1/(n-1))^{1/2} \sum_j | I_{\text{hkl},j} - \langle I_{\text{hkl}} \rangle | ] / [ \sum_{\text{hkl}} \sum_j I_{\text{hkl},j} ]$  where I is the observed intensity for a reflection and  $\langle I \rangle$  is the average intensity obtained from multiple observations of symmetry-related reflections.

|                                                   | LH3/PL0D3<br>+ Fe <sup>2+</sup> + Mn <sup>2+</sup><br>+ UDP | LH3/PL0D3<br>+ Fe <sup>2+</sup> + Mn <sup>2+</sup><br>+ UDP-GlcA | LH3/PL0D3<br>+ Fe <sup>2+</sup> + Mn <sup>2+</sup><br>+ UDP-Xyl | LH3/PL0D3<br>Val80Lys<br>+ Fe <sup>2+</sup> + Mn <sup>2+</sup> | LH3/PL0D3<br>Val80Lys<br>+ Fe <sup>2+</sup> + Mn <sup>2+</sup><br>+ UDP-Glc | LH3/PL0D3<br>Val80Lys<br>+ Fe <sup>2+</sup> + Mn <sup>2+</sup><br>+ UDP-GlcA | LH3/PL0D3<br>Asp190Ser +<br>Fe <sup>2+</sup> + Mn <sup>2+</sup><br>+ UDP-Glc |
|---------------------------------------------------|-------------------------------------------------------------|------------------------------------------------------------------|-----------------------------------------------------------------|----------------------------------------------------------------|-----------------------------------------------------------------------------|------------------------------------------------------------------------------|------------------------------------------------------------------------------|
| <b>Refinement</b>                                 |                                                             |                                                                  |                                                                 |                                                                |                                                                             |                                                                              |                                                                              |
| R <sub>work</sub> /R <sub>free</sub> <sup>c</sup> | 0.1943/0.2458                                               | 0.1982/0.2411                                                    | 0.1852/0.2159                                                   | 0.2079/0.2412                                                  | 0.1701/0.2268                                                               | 0.1895/0.2278                                                                | 0.2043/0.2288                                                                |
| Number of atoms:                                  | 5874                                                        | 6293                                                             | 6019                                                            | 5732                                                           | 5938                                                                        | 5893                                                                         | 6125                                                                         |
| Protein                                           | 5646                                                        | 5754                                                             | 5754                                                            | 5665                                                           | 5736                                                                        | 5716                                                                         | 5693                                                                         |
| Ligands                                           | 73                                                          | 100                                                              | 105                                                             | 67                                                             | 92                                                                          | 104                                                                          | 109                                                                          |
| Solvent                                           | 155                                                         | 439                                                              | 160                                                             | -                                                              | 110                                                                         | 73                                                                           | 323                                                                          |
| Average B-factor (Å) <sup>2</sup>                 | 35.83                                                       | 36.51                                                            | 31.45                                                           | 42.33                                                          | 44.80                                                                       | 43.73                                                                        | 35.71                                                                        |
| Protein                                           | 35.73                                                       | 35.91                                                            | 31.16                                                           | 42.07                                                          | 44.54                                                                       | 42.99                                                                        | 35.33                                                                        |
| Ligands                                           | 56.66                                                       | 58.25                                                            | 53.94                                                           | 63.99                                                          | 64.67                                                                       | 91.24                                                                        | 54.65                                                                        |
| Solvent                                           | 29.78                                                       | 39.40                                                            | 26.84                                                           | -                                                              | 41.54                                                                       | 33.94                                                                        | 36.11                                                                        |
| <b>Structure quality</b>                          |                                                             |                                                                  |                                                                 |                                                                |                                                                             |                                                                              |                                                                              |
| RMS bond lengths (Å)                              | 0.006                                                       | 0.005                                                            | 0.003                                                           | 0.004                                                          | 0.009                                                                       | 0.003                                                                        | 0.002                                                                        |
| RMS bond angles (°)                               | 0.78                                                        | 0.84                                                             | 0.58                                                            | 0.70                                                           | 1.05                                                                        | 0.71                                                                         | 0.50                                                                         |
| <b>Ramachandran stats</b>                         |                                                             |                                                                  |                                                                 |                                                                |                                                                             |                                                                              |                                                                              |
| Favored (%)                                       | 97.5                                                        | 97.1                                                             | 97.0                                                            | 95.9                                                           | 96.3                                                                        | 96.5                                                                         | 96.5                                                                         |
| allowed (%)                                       | 2.5                                                         | 2.7                                                              | 2.9                                                             | 3.8                                                            | 3.6                                                                         | 3.3                                                                          | 3.0                                                                          |
| outliers (%)                                      | 0.0                                                         | 0.2                                                              | 0.1                                                             | 0.3                                                            | 0.1                                                                         | 0.2                                                                          | 0.5                                                                          |
| PDB ID                                            | 6TE3                                                        | 6TES                                                             | 6TEC                                                            | 6TEU                                                           | 6TEX                                                                        | 6TEZ                                                                         | 8ONE                                                                         |

<sup>c</sup> R<sub>free</sub> values are calculated based on 5% randomly selected reflections, selected prior to STARANISO correction as recommended by the software developers (Tickle et al, 2018).

**Table S2: List of glycosyltransferase enzymes used for comparisons with human LH3/PLD3.** The list includes the indication of the catalytic bases and nucleophile residues as proposed in the original papers describing the various glycosyltransferases, with the corresponding residue number in human LH3/PLD3 based on structural superpositions.

| Protein Name                                                                                    | Type      | PDB ID | catalytic base residue | nucleophile acceptor residue | corresp. LH3/PLD3 residue | reference paper                                       |
|-------------------------------------------------------------------------------------------------|-----------|--------|------------------------|------------------------------|---------------------------|-------------------------------------------------------|
| LgtC - GALACTOSYL TRANSFERASE LGTC ( <i>N. meningitidis</i> )                                   | retaining | 1GA8   |                        |                              |                           | Persson et al., 2001<br>10.1038/84168                 |
| GYG1 - Glycogenin ( <i>O. cuniculus</i> )                                                       | retaining | 1LL2   |                        | Asp163                       | Asp191                    | Gibbons et al., 2002<br>10.1016/S0022-2836(02)00305-4 |
| mgs - Mannosylglycerate synthase ( <i>R. marinus</i> )                                          | retaining | 2BO8   |                        |                              |                           | Flint et al., 2005<br>10.1038/nsmb950                 |
| GALNT10 - Polypeptide N-acetylgalactosaminyl transferase 10 ( <i>H. sapiens</i> )               | retaining | 2D7R   |                        | Gln346                       | Asp190                    | Kubota et al., 2006<br>10.1016/j.jmb.2006.03.061      |
| GGTA1 - N-Acetylglucosaminide $\alpha$ -1,3-galactosyl transferase (R365K) ( <i>B. taurus</i> ) | retaining | 5NRB   |                        | Glu317                       | Gln192                    | Albesa-Jove et al., 2017<br>10.1002/anie.201707922    |
| ABO - Histo-blood group ABO system transferase ( <i>H. sapiens</i> )                            | retaining | 1LZI   |                        | Glu303                       | Gln192                    | Patenaude et al., 2002<br>10.1038/nsb832              |
| spsA - PROTEIN (SPORE COAT POLYSACCHARIDE BIOSYNTHESIS PROTEIN SPSA)                            | inverting | 1QGQ   | Asp191                 |                              | Asp191                    | Charnock et al., 1999<br>10.1128/JB.183.1.77-85.2001  |
| MGAT1 - N-acetylglucosaminyl transferase I ( <i>O. cuniculus</i> )                              | inverting | 1FOA   | Asp 291                |                              | Asp191                    | Unligil et al., 2000<br>10.1093/emboj/19.20.5269      |
| Mfng - Manic Fringe glycosyltransferase ( <i>M. musculus</i> )                                  | inverting | 2J0B   | Asp 232                |                              | Asp191                    | Jinek et al., 2006<br>10.1038/nsmb1144                |
| B3GAT3 - GLUCURONYLTRANSFERASE I                                                                | inverting | 1FGG   | Glu281                 |                              | Asp190                    | Pedersen et al., 2000<br>10.1074/jbc.M007399200       |
| B3GAT1 – Galactosylgalactosylxylosyl protein 3-beta-glucuronosyltransferase 1                   |           | 1V84   |                        |                              |                           | Kakuda et al., 2004<br>10.1074/jbc.M400622200         |

**Table S3: list of oligonucleotides used for mutagenesis**

| Oligonucleotide Name        | Sequence (5'→3')                  |
|-----------------------------|-----------------------------------|
| Forward LH3/PLOD3 Val80Lys  | AAGGCTCGAACAGTTGGTGGAGGAC         |
| Reverse LH3/PLOD3 Val80Lys  | ATCACCCCCTCGCCACTCCTC             |
| Forward LH3/PLOD3 Val80Gly  | GAGCTCGAACAGTTGGTGGAGGAC          |
| Reverse LH3/PLOD3 Val80Gly  | CATCACCCCCTCGCCACTCC              |
| Forward LH3/PLOD3 Trp92Ala  | GCATTAAAGAAGGAAATGGAGAAATACG      |
| Reverse LH3/PLOD3 Trp92Ala  | CCGGACCTTCTGTCCTCCACC             |
| Forward LH3/PLOD3 Glu141Ala | CGAGCTTCTGCTGGCCCCGAGTG           |
| Reverse LH3/PLOD3 Glu141Ala | CTGCAGAGAAGAGCAGGCGGCTG           |
| Forward LH3/PLOD3 Trp145Ala | GCACCCGAGTGGGGGCTGGC              |
| Reverse LH3/PLOD3 Trp145Ala | GCAGAAGCTCTCTGCAGAGAAGAGC         |
| Forward LH3/PLOD3 Trp148Ala | GCAGGGCTGGCGGAGCAGTAC             |
| Reverse LH3/PLOD3 Trp148Ala | CTCGGGCCAGCAGAAGCTCTC             |
| Forward LH3/PLOD3 Asn165Ala | GCTTCTGGTGGATTCATCGGTTTTGC        |
| Reverse LH3/PLOD3 Asn165Ala | GAGGAAGCGCTTCCCCGTGC              |
| Forward LH3/PLOD3 Asp190Ala | CTGACCAGCTGTTCTACACACGGC          |
| Reverse LH3/PLOD3 Asp190Ala | CGTCATCATCCTTGTA CTTCCTACTGG      |
| Forward LH3/PLOD3 Asp190Ser | AGCGACCAGCTGTTCTACACACGGCT        |
| Reverse LH3/PLOD3 Asp190Ser | GTCATCATCCTTGTA CTTCCTACTGGCG     |
| Forward LH3/PLOD3 Asp191Ala | CTCAGCTGTTCTACACACGGCTC           |
| Reverse LH3/PLOD3 Asp191Ala | CGTCGTCATCATCCTTGTA CTTCCTACTGG   |
| Forward LH3/PLOD3 Gln192Ala | GCGCTGTTCTACACACGGCTCTAC          |
| Reverse LH3/PLOD3 Gln192Ala | GTCGTCGTCATCATCCTTGTA CTTCCTACTGG |
| Forward LH3/PLOD3 Asn255Ala | GCCGGTCCCCTAAGCTGCAGC             |
| Reverse LH3/PLOD3 Asn255Ala | TCCATGGACCACAATGGGGAGCGTG         |
| Forward LH3/PLOD3 Pro270Leu | TCAATGGCTGGACTCCTGAGGG            |
| Reverse LH3/PLOD3 Pro270Leu | GGACGTAGTTTCCCAGGTAGTTGAG         |
| Forward LH1/PLOD1 Ser178Asp | GACGATCAGCTGTTTTACACCAAGATC       |
| Reverse LH1/PLOD1 Ser178Asp | GTCGCTGTCCTGGCCCTCCCACTCGG        |

**A**

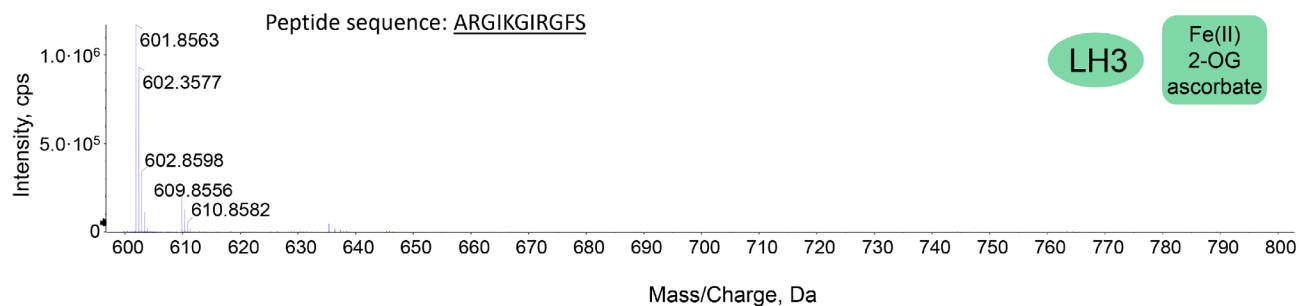

**B**

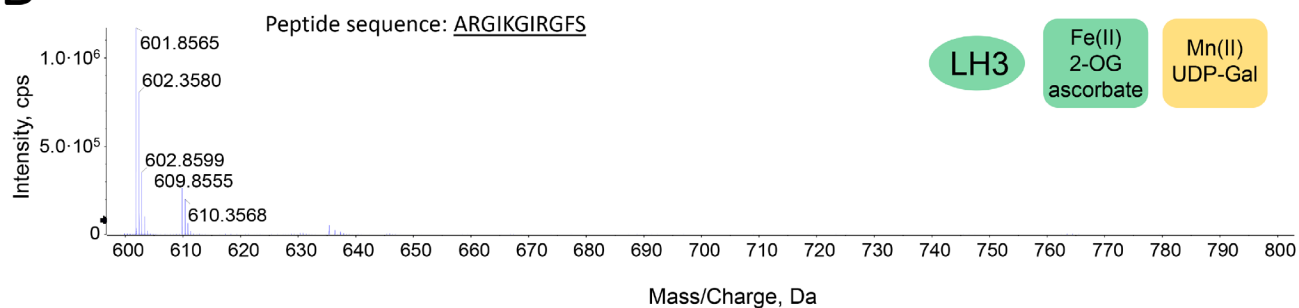

**C**

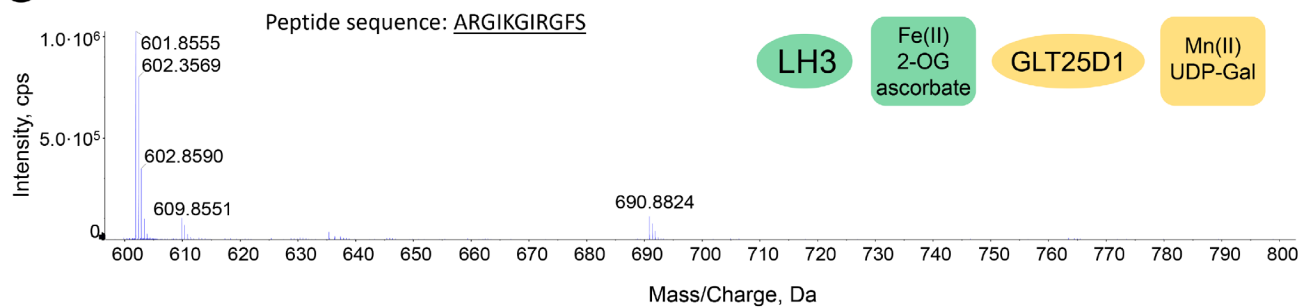

**D**

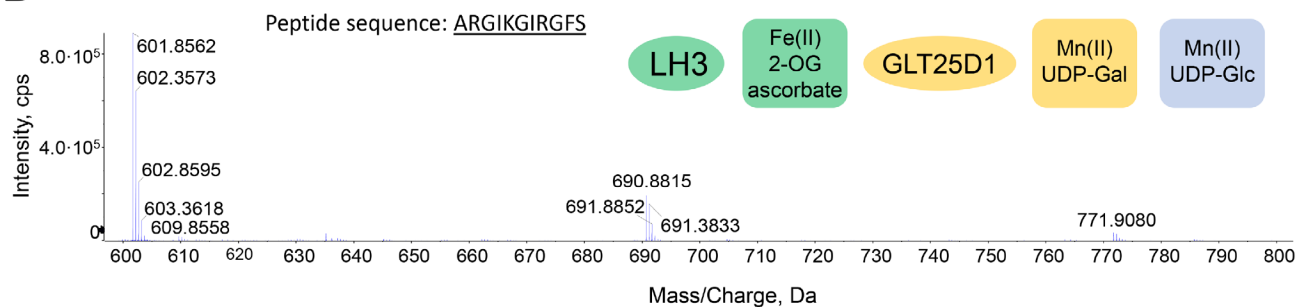

E

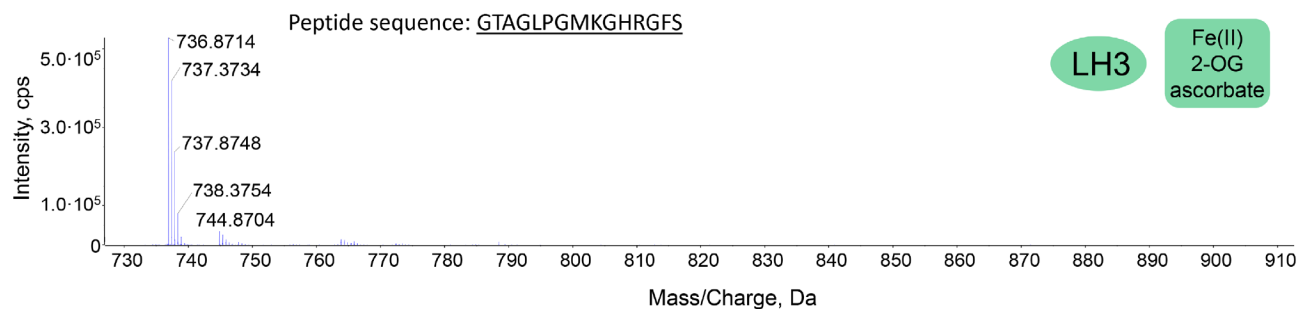

F

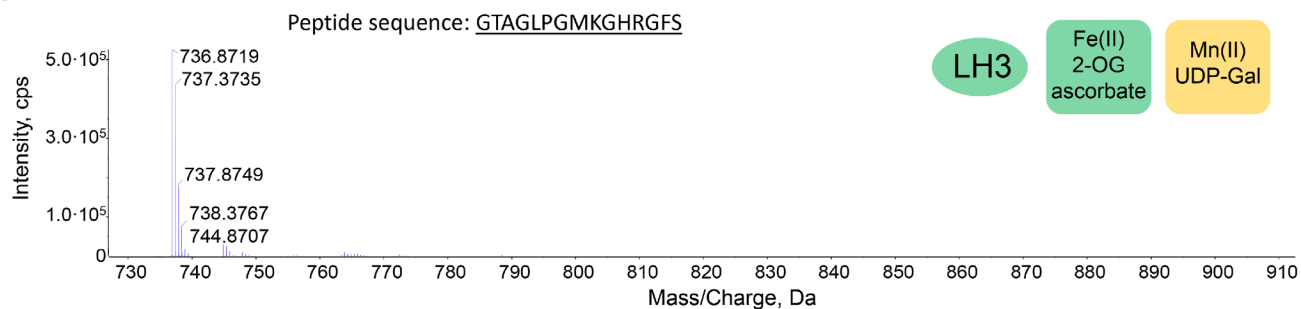

G

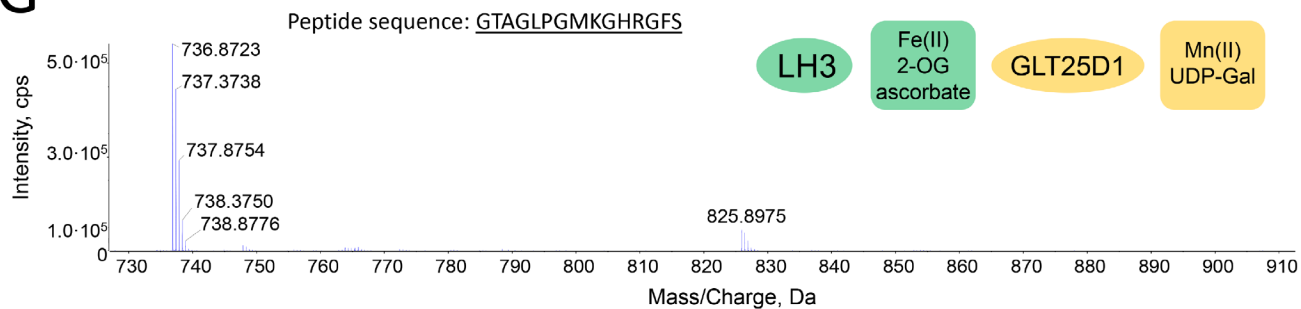

H

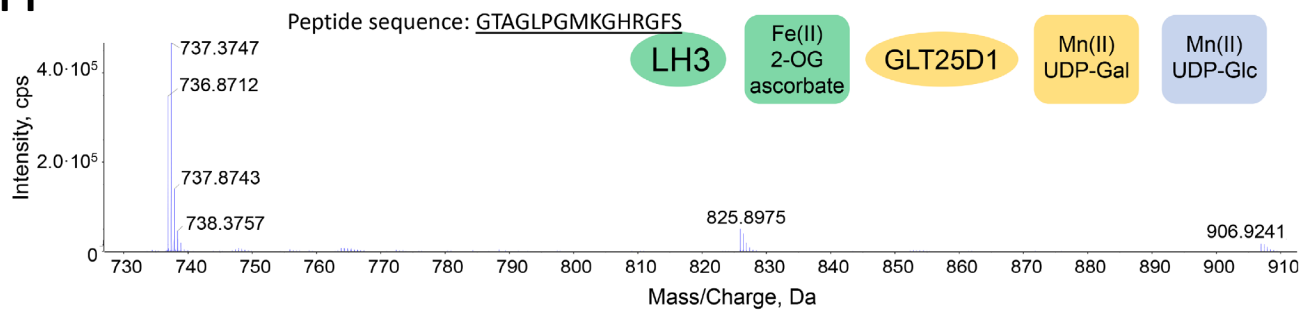

**Figure S1: Results of the direct MS activity assays with two different synthetic peptides other than GIKGIKGIKGIK shown in figure 1. Panels (A) to (D): peptide sequence ARGIKGIRGFS; panels (E) to (H): peptide sequence GTAGLPGMKGHRGFS.**

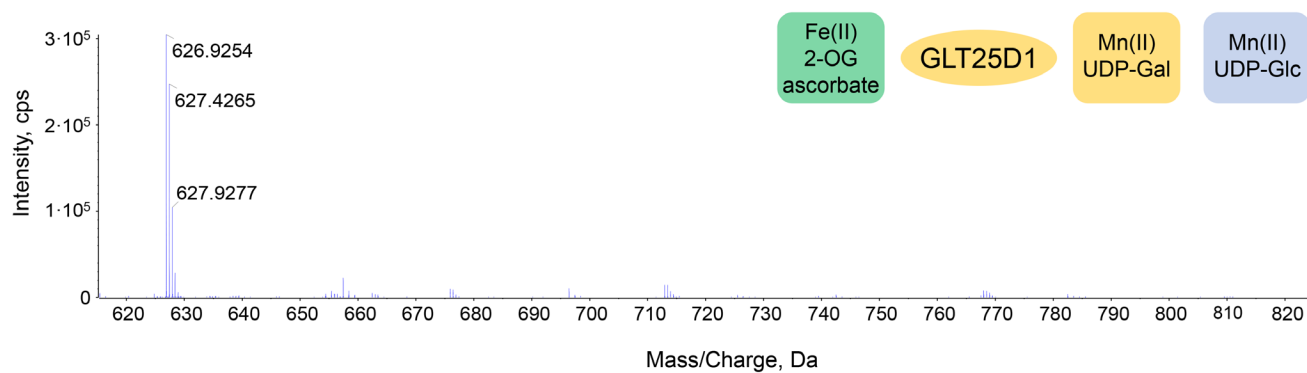

**Figure S2: Direct MS activity assay to evaluate Lys-to-Hyl conversion in absence of LH/PLOD enzymes.** The experiment shown was performed using the GIKGIKGIKGIK peptide. Results exclusively show the peak corresponding to the unmodified peptide (627 Da, doubly charged).

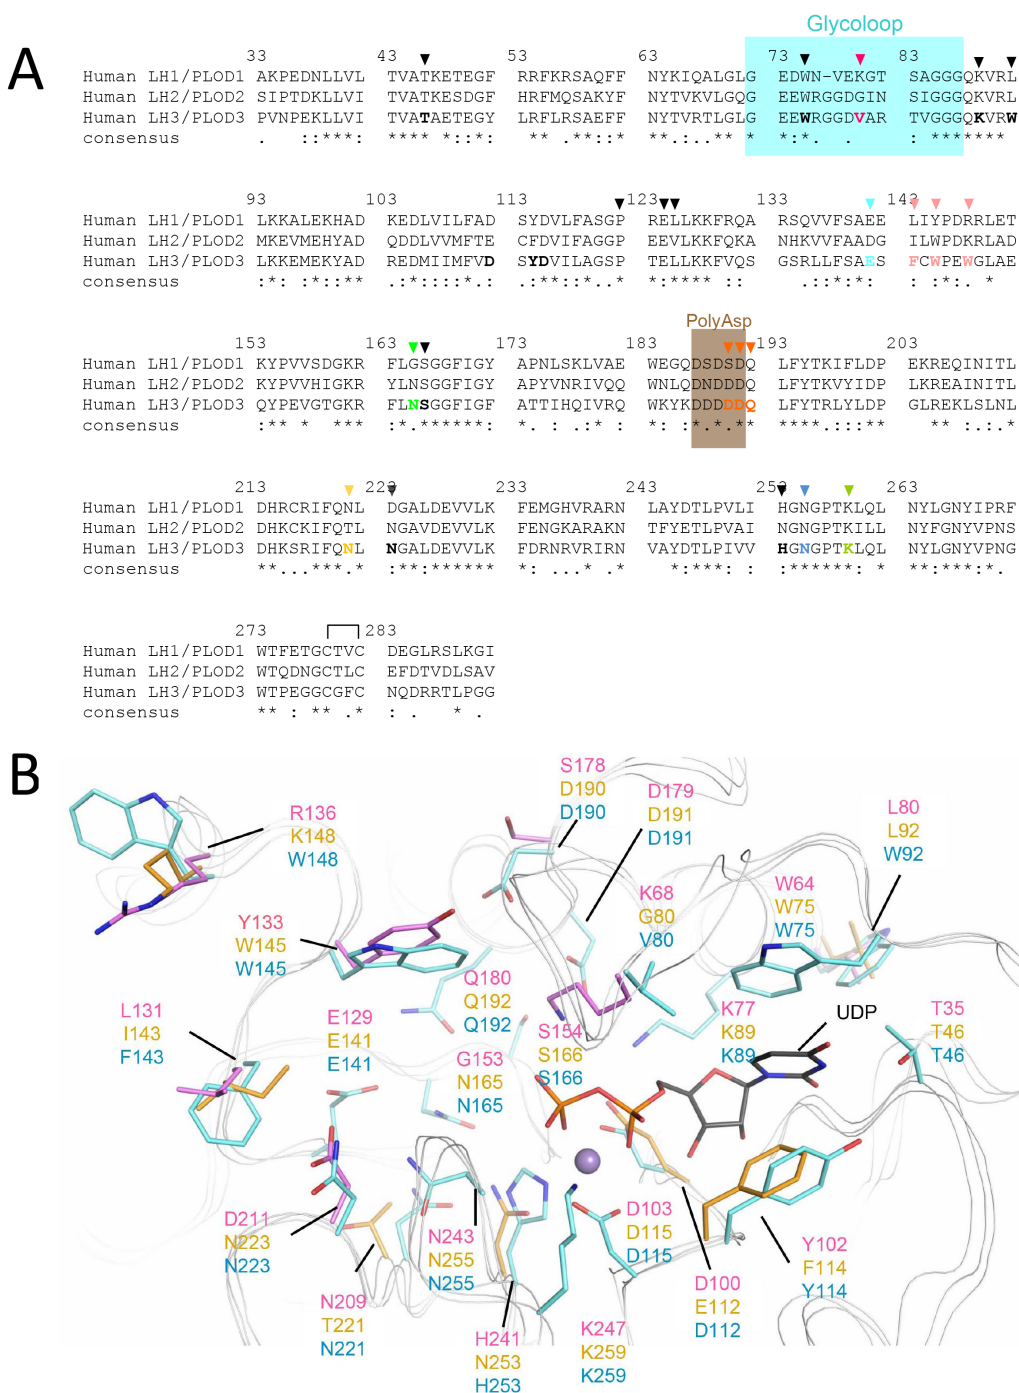

**Figure S3: Conserved features of the GT domains in human LH/PLOD isoenzymes.** (A) sequence alignment of human LH1/PLOD1, LH2/PLOD2 and LH3/PLOD3 GT domains, highlighting similarities and differences in the amino acid residues within the active site. Residues highlighted in Figure 2A are indicated here with a triangle. Colored boxes indicate the PolyAsp motif (brown) and the Glycoloop (cyan). (B) Superposition of the GT site of LH3/PLOD3 in complex with UDP-glucose (PDB ID: 6FXT) and LH1/PLOD1 and LH2/PLOD2 homology models (Scietti et al, 2019) (available at <http://fornerislab.unipv.it/SiMPLOD/>). Aminoacids identified as part of the LH3/PLOD3 catalytic site are shown as light blue sticks, while the LH1/PLOD1 and LH2/PLOD2 residues which differs from LH3/PLOD are shown in pink and orange respectively. UDP moiety (black lines) and  $Mn^{2+}$  cofactor (purple sphere) are also shown from the LH3/PLOD3 structure.

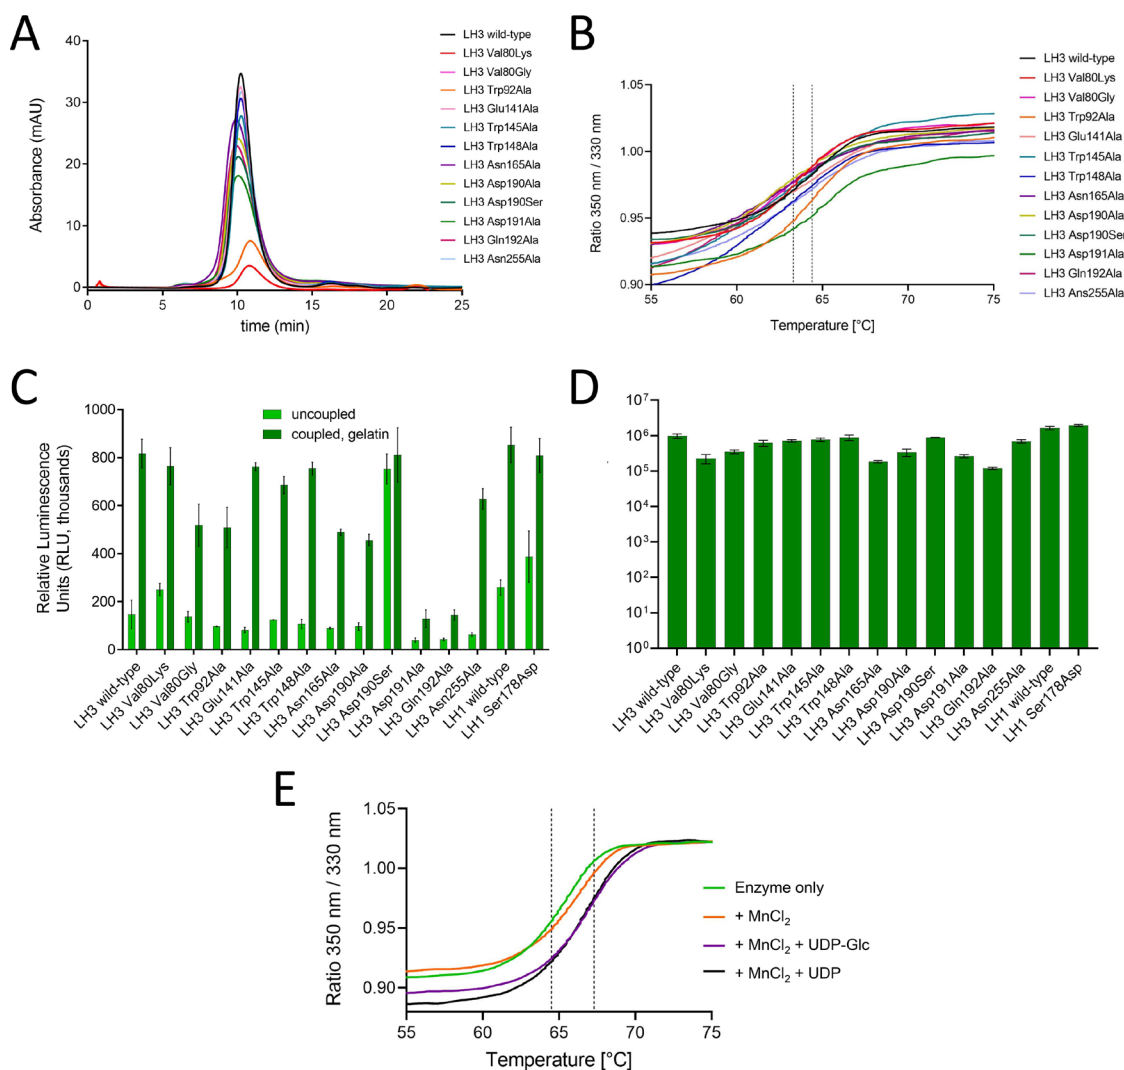

**Figure S4: biochemical evaluation of LH3/PLOD3 wild-type and mutants.** (A) Analytical size-exclusion chromatography analysis comparing wild-type and mutants LH3/PLOD3. (B) DSF comparing wild-type and mutants LH3/PLOD3. The dashed lines indicate the temperature range incorporating the calculated  $T_m$  values for all curves. (C) LH activity comparison for wild-type and mutants LH3/PLOD3 using indirect luminescence-based assays. The measurements were performed in absence (“uncoupled”) and in presence (“coupled”) of gelatin acceptor substrates, as described in (Sciatti et al, 2018). Error bars represent standard deviations from average of triplicate independent experiments. (D) Assessment of LH enzymatic activity using direct MS-based assays for all LH3/PLOD3 mutants described in this work. (E) DSF analysis of UDP and UDP-Glc binding by LH3/PLOD3 Asp190Ser mutant.

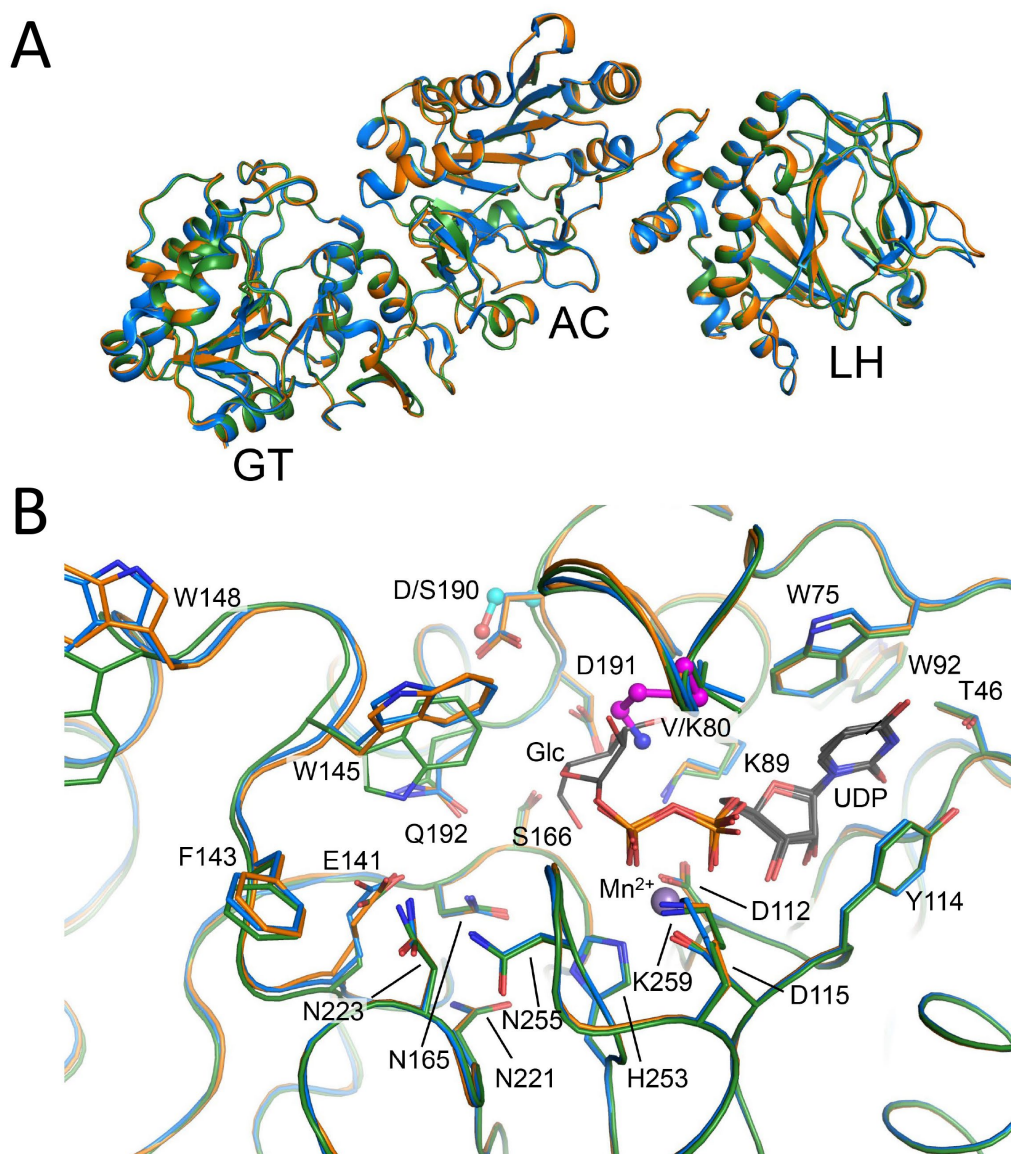

**Figure S5: Structural comparison of the LH3/PLD3 wild-type and mutant structures in complex with UDP-glucose.** (A) The overall structure superposition of the asymmetric units of LH3/PLD3 wild-type (blue), Val80Lys (orange), and Asp190Ser (green) shows that the two structures are almost identical. (B) Zoomed view of the GT active site of the superimposed structures shown in (A) with the same overall coloring, indicating that the sole differences are constituted by the mutated Val80 to Lys in the Val80Lys structure (shown in pink ball-and-stick) and the mutated Asp190 to Ser in the Asp190Ser structure (shown in cyan ball-and-stick).

*LH3 (6FXR)*

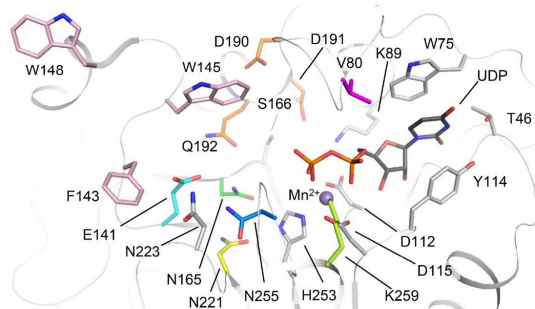

*LgtC (1GA8)*

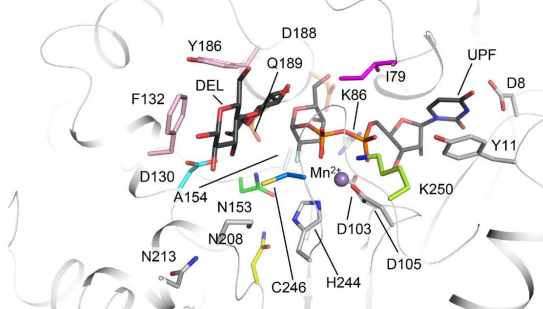

*GYG1 (1LL2)*

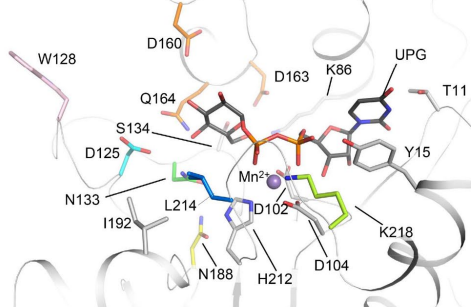

*mgs (2BO8)*

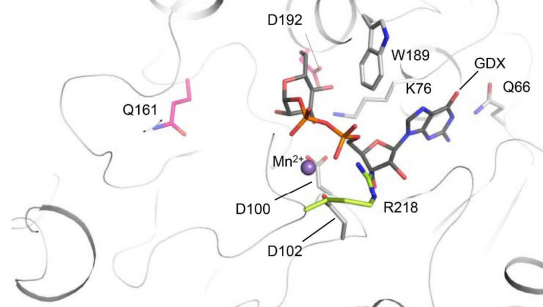

*GALNT10 (2D7R)*

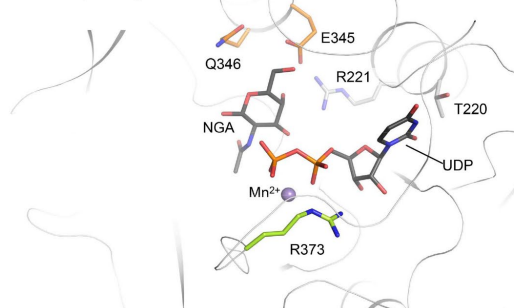

*GGTA1 (5NRB)*

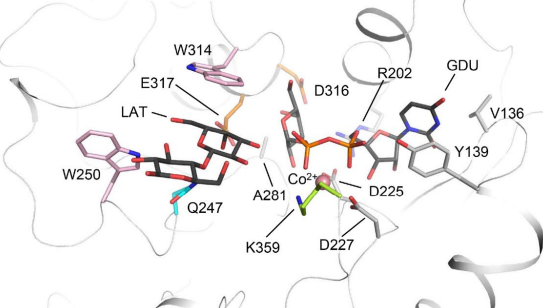

*ABO(1LZI)*

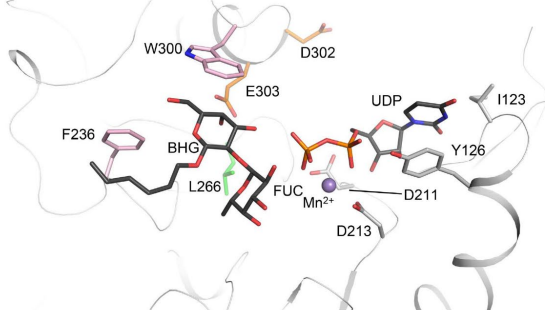

*spsA (1QGQ)*

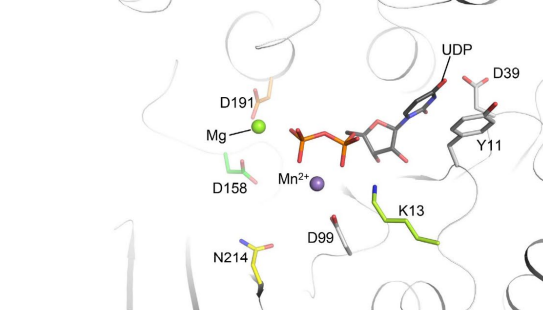

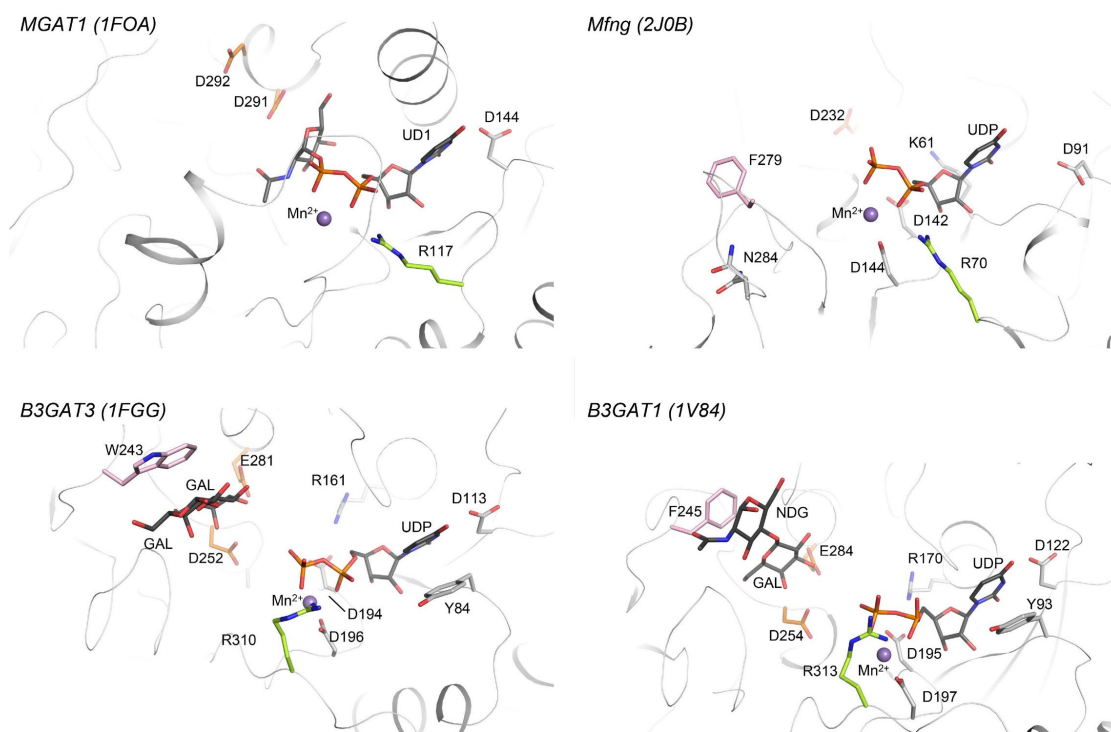

**Figure S6: structural comparison between LH3/PLOD3 and other glycosyltransferases.** The conserved aminoacids are shown as sticks; where present,  $Mn^{2+}$  cofactor and UDP-sugar are shown as purple sphere and black sticks respectively. Protein name and related PDB ID are indicated for each panel. Colour coding is as in Figure 2A and is maintained throughout the structures allowing to compare the LH3/PLOD3 critical residues with the other structures. For additional information on the proteins indicated in this panel refer to Table S2.

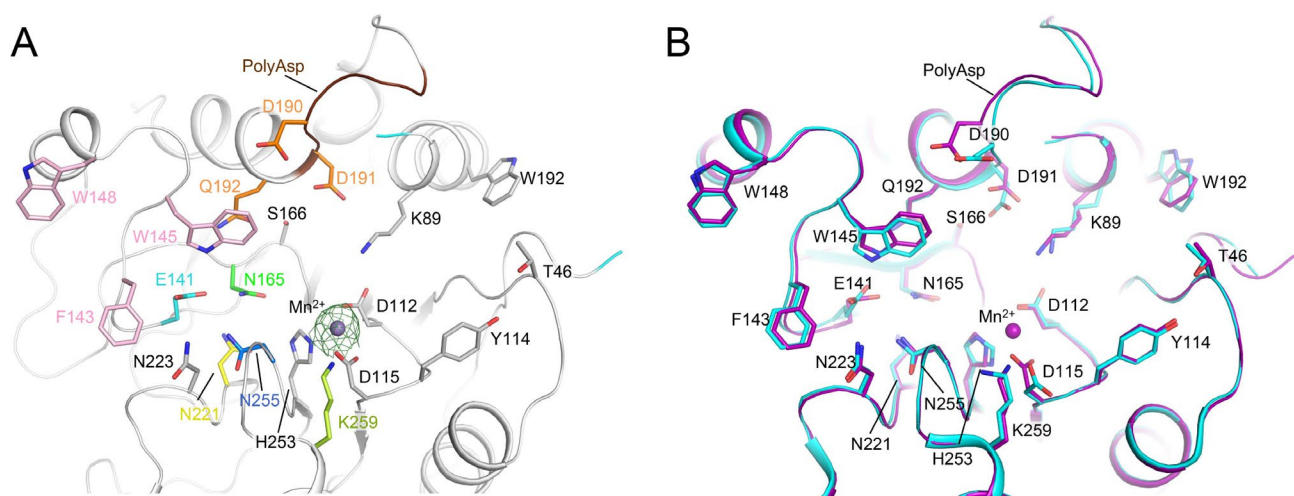

**Figure S7: comparison of the GT domains of wild-type LH3/PLD3 in ligand-bound and ligand-free states.** (A) The structure of wild-type LH3/PLD3 crystallized in presence of  $Mn^{2+}$  and UDP shows clear electron density for  $Mn^{2+}$  ( $2F_o-F_c$  omit electron density map shown as green mesh, contour level  $2\sigma$ ), but unexpectedly no density is present for UDP. Residue highlight and colouring as in Figure 1A. (B) The comparative superposition of wild-type LH3/PLD3 GT domain co-crystallized in presence of  $Mn^{2+}$  and UDP (purple), and without cofactors (cyan – PDB ID: 6FXK) shows no differences in the conformations of the side chains for the residues delimiting the Glc-T catalytic site.
